# Supplementary material for: Electrocatalytic activity of a β-Sb two-dimensional surface for the hydrogen evolution reaction
Source: Royal Society of Chemistry journal article supplement (doi:10.1039/d2cp01095j), 2022-01-01
Supplement: d2cp01095j1.pdf [file d2cp01095j1.pdf]

## Electrocatalytic activity of $\beta$ -Sb two-dimensional surface for hydrogen evolution reaction

Mengya Yang<sup>1</sup>, Xiaoyan Ren<sup>1</sup>, Shunfang Li<sup>1</sup>, Yingjiu Zhang<sup>2</sup>, Xinjian Li<sup>2</sup>, Rui Pang<sup>1\*</sup>, Yuanyuan Shang<sup>2\*</sup>

<sup>1</sup>International Laboratory for Quantum Functional Materials of Henan, School of Physics and Microelectronics, Zhengzhou University, Zhengzhou 450001, PR China

<sup>2</sup>Key Laboratory of Material Physics, Ministry of Education, School of Physics and Microelectronics, Zhengzhou University, Zhengzhou 450052, PR China

\*Corresponding authors: [pangrui@zzu.edu.cn](mailto:pangrui@zzu.edu.cn), [yuanyuanshang@zzu.edu.cn](mailto:yuanyuanshang@zzu.edu.cn)

### Supporting Information:

Fig. S1 The optimized  $\beta$ -Sb structure diagram shows (a) side view; (b) top view. (c) The temperature fluctuation at 300 K of the Te@Sb structure as a function of the ab initio molecular dynamics (AIMD) simulation time. The time-step is 1 fs.

Fig. S2 (a) The  $\Delta G_{\text{H}^*}^{\Delta G}$  and formation energies of the As@Sb structure at 5 and 15 valence electrons, and (b) the  $\Delta G_{\text{H}^*}^{\Delta G}$  at 400eV, 450eV, and 500eV of the As@Sb structure.

Fig. S3 The lowest energy configurations of the adsorption behavior of H atom on the surface of (a) pristine  $\beta$ -Sb monolayer, (b) P@Sb, (c) As@Sb, (d) O@Sb, (e) S@Sb, (f) Se@Sb, and (g) Te@Sb structures.

Fig. S4 The relationship between spin-orbit coupling and HER catalysis.

Fig. S5 (a) The structure of doped atomic. (b) Formation energy increases with doping concentration.

Fig. S6 The Te@Sb structure applies biaxial compressive strain in the  $x$  and  $y$  directions.

Fig. S7 The relationship between the number of electrons transferred from activated Sb atoms to Se and As dopants and the ability of Se@Sb structure and As@Sb structure to trap hydrogen atoms, respectively.

Fig.S8 Atom-partial density of states (PDOS) of (a)  $\beta$ -, (b) As@, (c) O@, (d) S@, (e) Se@ and (f) Te@Sb.

Fig. S9 The charge density difference profile with top and side views for H atom adsorbed on the surface of (a) P@Sb, (b) As@Sb, (c) O@Sb, (d) S@Sb, (e) Se@Sb, and (f) Te@Sb structures. Yellow/blue color represents the electron accumulation/depletion. The isovalue is set to 0.001 e/Å<sup>3</sup>.

Fig. S10 The values of D@Sb-H structure under different vdW corrections (D=O, S, Se, Te).

Detailed data:

- (1) Doping structure atomic coordinates (Cartesian).
- (2) D@Sb-H structure atomic coordinates (Cartesian)

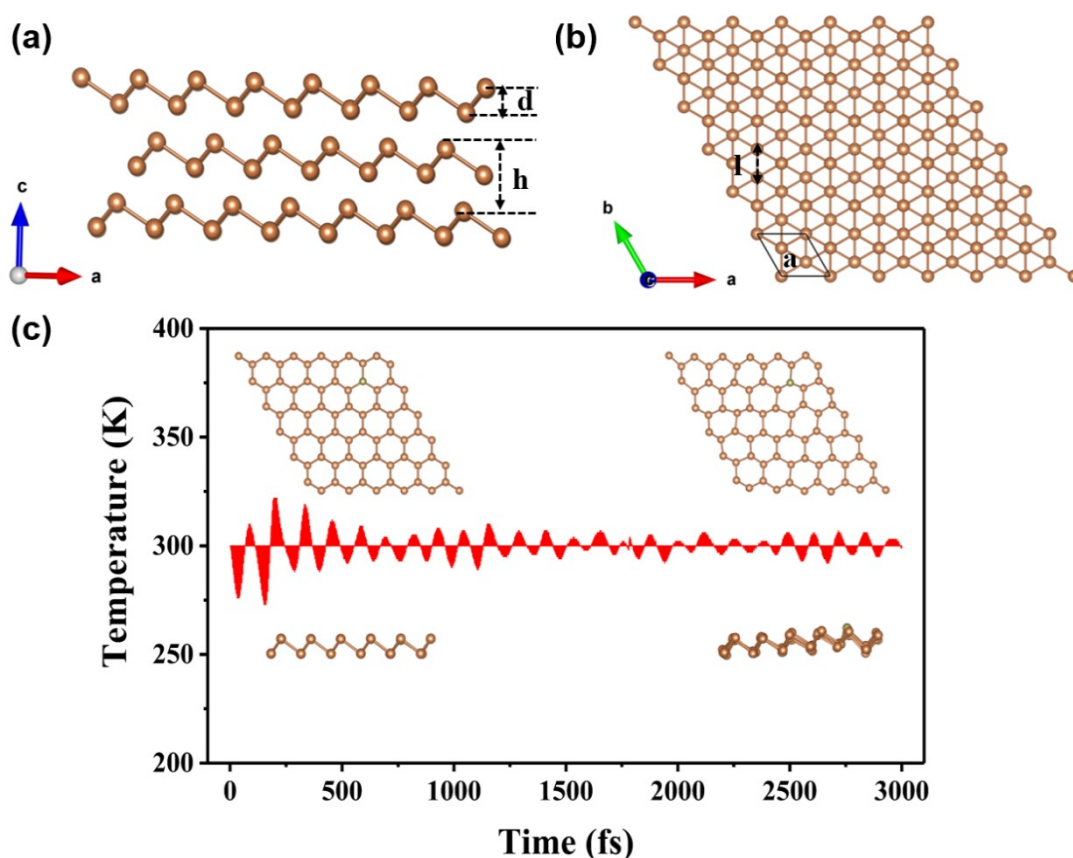

**Fig.S1** The optimized  $\beta$ -Sb structure diagram shows (a) side view; (b) top view. (c) The temperature fluctuation at 300 K of the Te@Sb structure as a function of the ab initio molecular dynamics (AIMD) simulation time. The time-step is 1 fs.

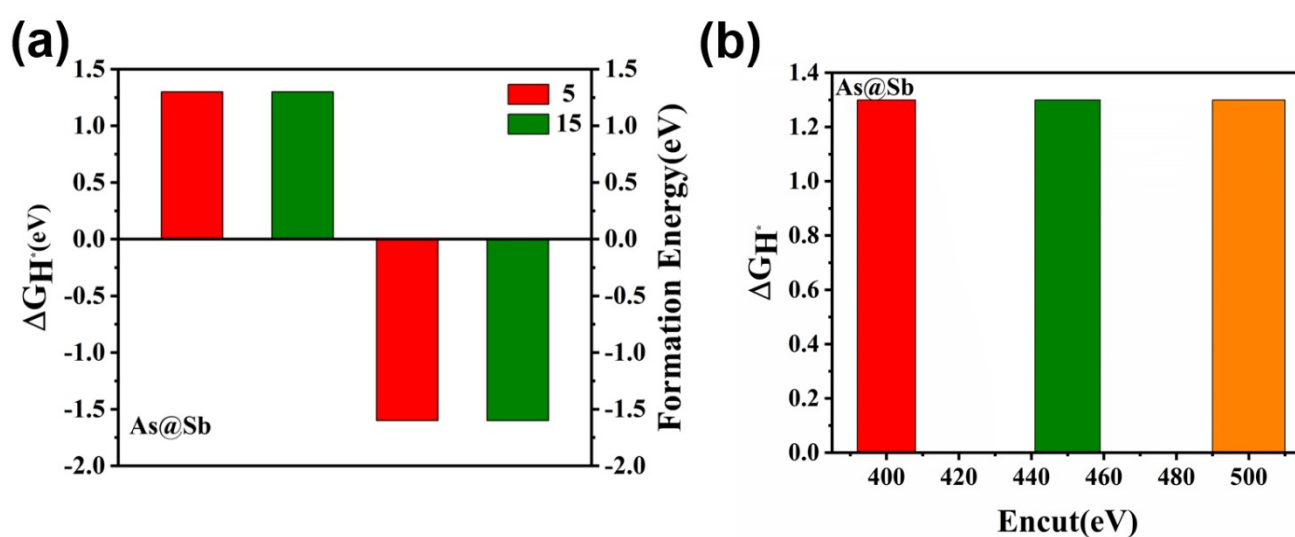

**Fig. S2** (a) The  $\Delta G_H^*$  and formation energies of the As@Sb structure at 5 and 15 valence electrons, and (b) the  $\Delta G_H^*$  at 400eV, 450eV, and 500eV of the As@Sb structure.

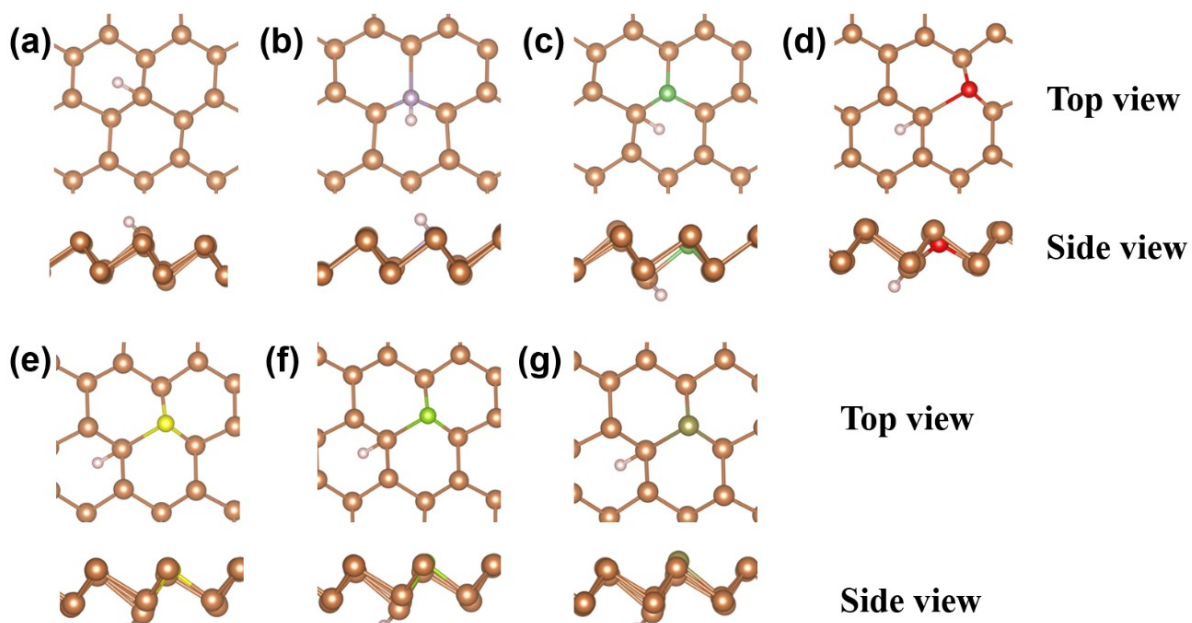

**Fig. S3** The lowest energy configurations of the adsorption behavior of H atom on the surface of (a) pure  $\beta$ -Sb monolayer, (b) P@Sb, (c) As@Sb, (d) O@Sb, (e) S@Sb, (f) Se@Sb, and (g) Te@Sb structures.

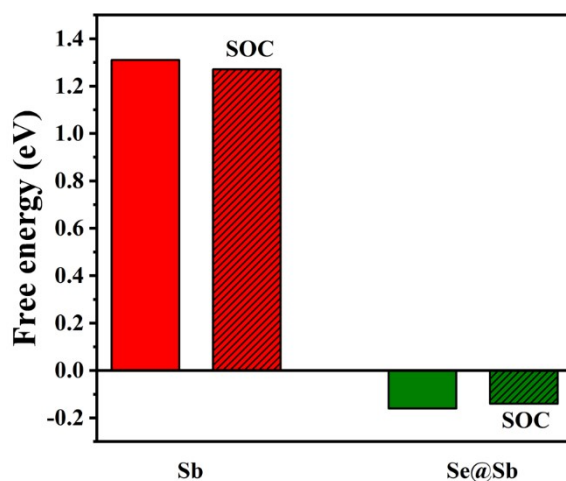

**Fig. S4** The relationship between spin-orbit coupling and HER catalysis.

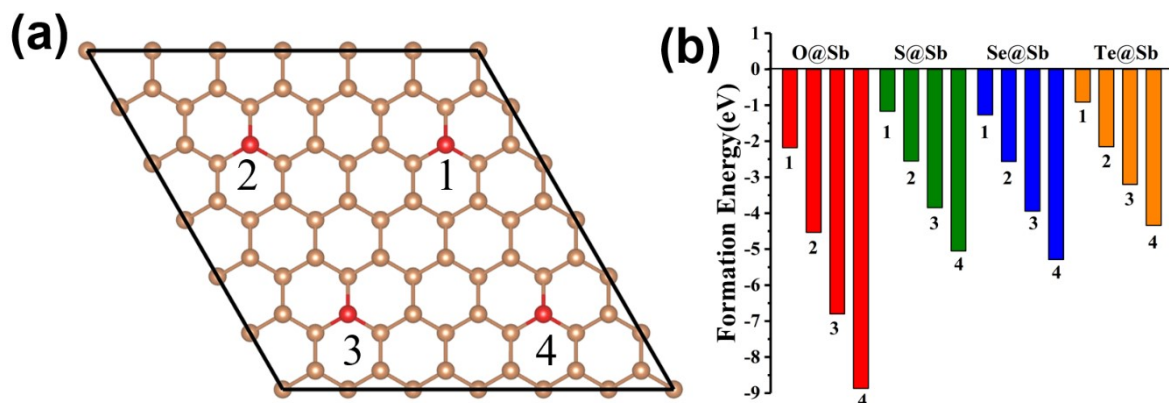

**Fig. S5** (a) The structure of doped atomic. (b) Formation energy increases with doping concentration.

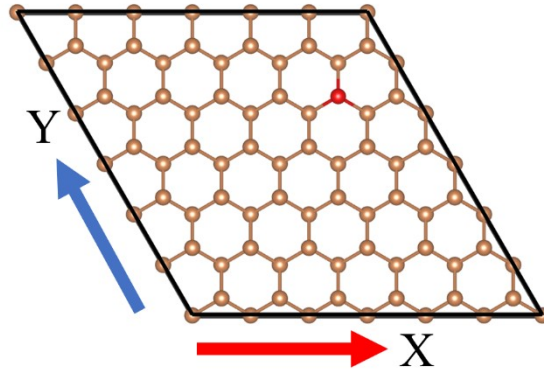

**Fig. S6** The Te@Sb structure applies biaxial compressive strain in the x and y directions.

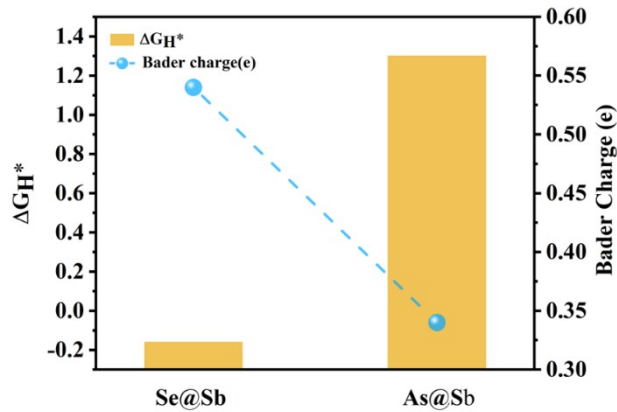

**Fig. S7** The relationship between the number of electrons transferred from activated Sb atoms to Se and As dopants and the ability of Se@Sb structure and As@Sb structure to trap hydrogen atoms, respectively.

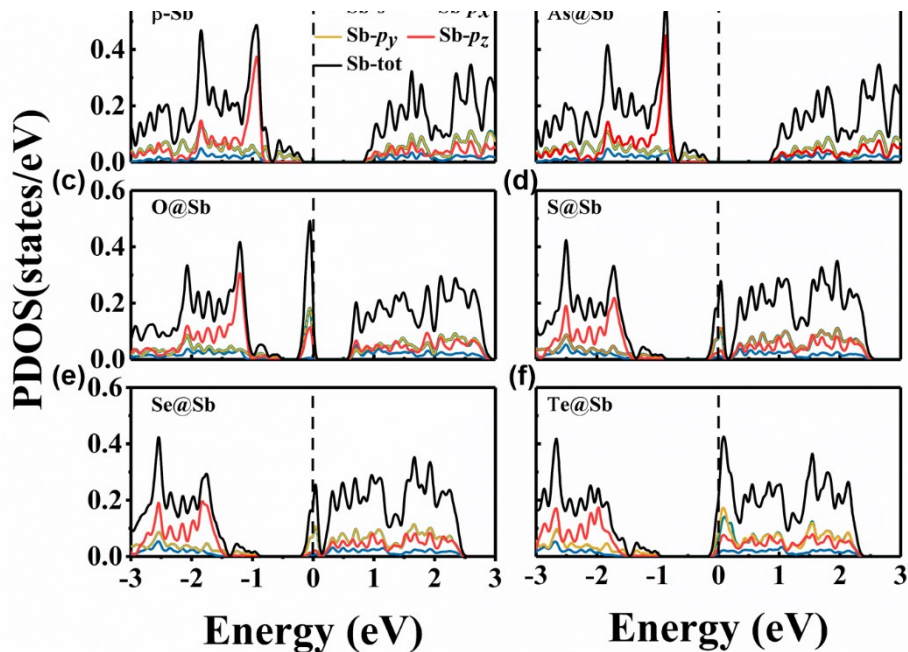

**Fig.S8** Atom-partial density of states (PDOS) of (a)  $\beta$ -, (b) As@, (c) O@, (d) S@, (e) Se@ and (f) Te@Sb.

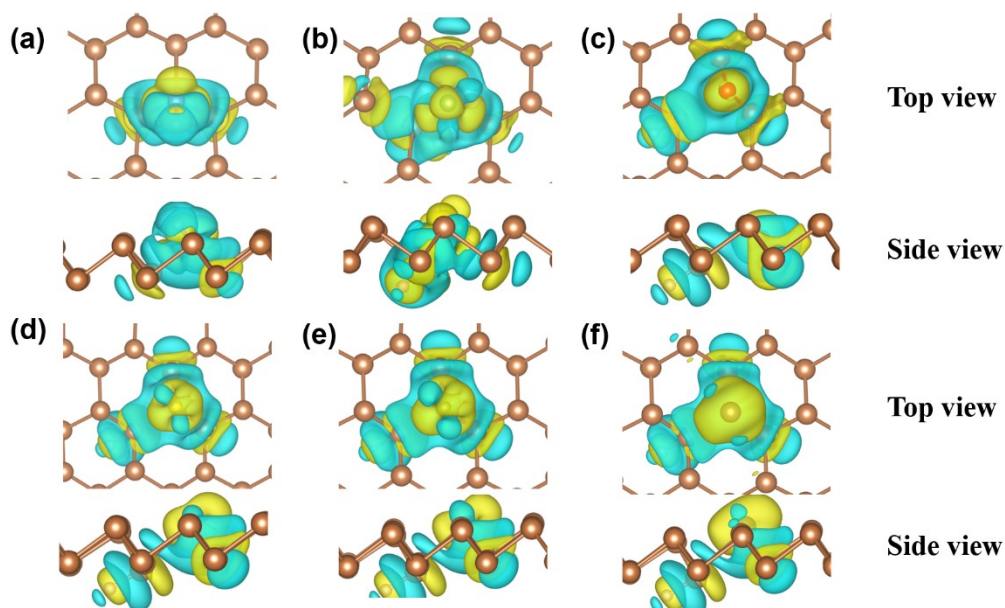

**Fig. S9** The charge density difference profile with top and side views for H atom adsorbed on the surface of (a) P@Sb, (b) As@Sb, (c) O@Sb, (d) S@Sb, (e) Se@Sb, and (f) Te@Sb structures. Yellow/blue color represents the electron accumulation/depletion. The isovalue is set to  $0.001 \text{ e}/\text{\AA}^3$ .

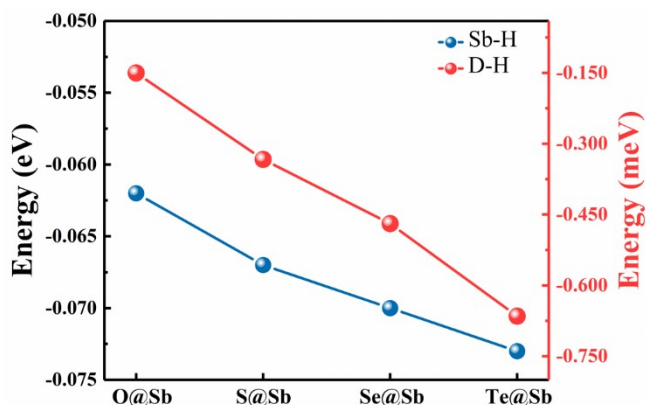

**Fig. S10** The values of D@Sb-H structure under different vdW corrections (D=O, S, Se, Te).

Detailed data

(1) Doped structure atomic coordinates (Cartesian)

N@Sb

1.0

|                |               |               |
|----------------|---------------|---------------|
| 24.3805007935  | 0.0000000000  | 0.0000000000  |
| -12.1902634379 | 21.1142400404 | 0.0000000000  |
| 0.0000000000   | 0.0000000000  | 20.0000000000 |

Sb N

71 1

Cartesian

|              |              |              |
|--------------|--------------|--------------|
| 12.130661011 | 21.013271332 | 10.432633400 |
| 2.009266853  | 1.111714482  | 12.056390762 |

|              |              |              |
|--------------|--------------|--------------|
| -8.127149582 | 21.099969864 | 10.391741753 |
| 6.085111618  | 1.179702997  | 12.056484222 |
| -4.068029404 | 21.112737656 | 10.401257515 |
| 10.156547546 | 1.174188137  | 12.066317558 |
| 0.002830505  | 21.113311768 | 10.404127121 |
| 14.232851028 | 1.174009919  | 12.060780525 |
| 4.067987442  | 21.099443436 | 10.395013809 |
| 18.313028336 | 1.111789465  | 12.057273865 |
| 8.187790871  | 21.012945175 | 10.429600716 |
| 22.347991943 | 1.157109380  | 12.099037170 |
| 22.346279144 | 3.491767168  | 10.406036377 |
| -0.004935980 | 4.689349651  | 12.060933113 |
| 2.012857437  | 3.487371445  | 10.403418541 |
| 4.067269802  | 4.688616276  | 12.045497894 |
| 6.097594261  | 3.517843962  | 10.378194809 |
| 8.116594315  | 4.697109699  | 12.056613922 |
| 10.159394264 | 3.524378777  | 10.402170181 |
| 12.199069977 | 4.701789379  | 12.057867050 |
| 14.220008850 | 3.515557051  | 10.386758804 |
| 16.252140045 | 4.687285423  | 12.049093246 |
| 18.303379059 | 3.486755848  | 10.403199196 |
| 20.318153381 | 4.685467243  | 12.065855026 |
| 20.304731369 | 7.034789562  | 10.396682739 |
| -2.032166243 | 8.212240219  | 12.048025131 |
| 0.004770279  | 7.035099506  | 10.387296677 |
| 2.030347347  | 8.217226028  | 12.061527252 |
| 4.079230309  | 7.068983555  | 10.404435158 |
| 6.135764122  | 8.260087967  | 12.056002617 |
| 8.138004303  | 7.044438839  | 10.391368866 |
| 10.160322189 | 8.205426216  | 12.075886726 |
| 12.180170059 | 7.046451569  | 10.388113022 |
| 14.178288460 | 8.259754181  | 12.059530258 |
| 16.235742569 | 7.069314003  | 10.410450935 |
| 18.280296326 | 8.215317726  | 12.073956490 |
| 18.254980087 | 10.573672295 | 10.420820236 |
| -4.067447662 | 11.732677460 | 12.068737030 |
| -2.033849239 | 10.567411423 | 10.391645432 |
| 0.006284714  | 11.733729362 | 12.059448242 |
| 2.056789875  | 10.572402000 | 10.404538155 |
| 4.076854229  | 11.739040375 | 12.099885941 |
| 6.152669907  | 10.659092903 | 10.433387756 |
| 8.217193604  | 11.844188690 | 12.093869209 |

|               |              |              |
|---------------|--------------|--------------|
| 10.162099838  | 10.553195953 | 10.417764664 |
| 12.098068237  | 11.844754219 | 12.102899551 |
| 14.163648605  | 10.661764145 | 10.441720963 |
| 16.233493805  | 11.742319107 | 12.114570618 |
| 16.132320404  | 14.074659348 | 10.441057205 |
| -6.157128334  | 15.261104584 | 12.055636406 |
| -4.099466801  | 14.075057983 | 10.403114319 |
| -2.030460835  | 15.253242493 | 12.043260574 |
| 0.036924362   | 14.079136848 | 10.397893906 |
| 2.096877098   | 15.255234718 | 12.055547714 |
| 4.181506157   | 14.073443413 | 10.429700851 |
| 6.238350868   | 15.270005226 | 12.092305183 |
| 8.409134865   | 14.238757133 | 10.413208961 |
| 11.910531998  | 14.237489700 | 10.419583321 |
| 14.075939178  | 15.272311211 | 12.102722168 |
| -10.153890610 | 17.594789505 | 10.417776108 |
| -8.120904922  | 18.768402100 | 12.076606750 |
| -6.107657909  | 17.600238800 | 10.387009621 |
| -4.067282677  | 18.757026672 | 12.056049347 |
| -2.029237747  | 17.601819992 | 10.384445190 |
| 0.004902840   | 18.758897781 | 12.060509682 |
| 2.047084808   | 17.599163055 | 10.394892693 |
| 4.067926407   | 18.765735626 | 12.076731682 |
| 6.094917297   | 17.594785690 | 10.410641670 |
| 8.180918694   | 18.632888794 | 12.091416359 |
| 10.158987999  | 17.268926620 | 10.411978722 |
| 12.135277748  | 18.633089066 | 12.093408585 |
| 10.158886909  | 15.248711586 | 11.230043411 |

P@Sb

1.0

|                |               |               |
|----------------|---------------|---------------|
| 24.3805007935  | 0.0000000000  | 0.0000000000  |
| -12.1902634379 | 21.1142400404 | 0.0000000000  |
| 0.0000000000   | 0.0000000000  | 20.0000000000 |

Sb P

71 1

Cartesian

|              |              |             |
|--------------|--------------|-------------|
| 12.170534134 | 21.077171326 | 2.881673336 |
| 2.023407936  | 1.152594447  | 4.534614563 |
| 4.065512180  | 0.002167138  | 2.867227077 |
| 6.093814850  | 1.171839476  | 4.539988041 |
| 8.123562813  | 0.002142686  | 2.868497133 |

|              |              |             |
|--------------|--------------|-------------|
| 10.158782005 | 1.172868609  | 4.533176422 |
| 0.001513481  | 21.113372803 | 2.867157459 |
| 14.225232124 | 1.173838735  | 4.532209396 |
| 16.255802155 | 0.000965949  | 2.863541842 |
| 18.302270889 | 1.146642685  | 4.527239323 |
| 8.149919510  | 21.069406509 | 2.869481564 |
| 22.343358994 | 1.168265820  | 4.538482189 |
| 22.343223572 | 3.512155294  | 2.865320206 |
| -0.003543377 | 4.691079140  | 4.526925564 |
| 2.029827118  | 3.508463383  | 2.871849060 |
| 4.062731743  | 4.692464828  | 4.537708282 |
| 6.096453667  | 3.518288612  | 2.875024080 |
| 8.127208710  | 4.693806171  | 4.539983749 |
| 10.155020714 | 3.520772457  | 2.868475914 |
| 12.192457199 | 4.693779469  | 4.528132915 |
| 14.225996971 | 3.519453526  | 2.865648270 |
| 16.252567291 | 4.691041470  | 4.537187576 |
| 18.291490555 | 3.509908199  | 2.876153946 |
| 20.319551468 | 4.691009045  | 4.538228035 |
| 20.313945770 | 7.033164501  | 2.865370274 |
| -2.031247139 | 8.210831642  | 4.524498463 |
| 0.001311779  | 7.037332058  | 2.859330416 |
| 2.030786991  | 8.214676857  | 4.526925087 |
| 4.071640968  | 7.045019150  | 2.871849537 |
| 6.108661175  | 8.228519440  | 4.534613609 |
| 8.125997543  | 7.035210609  | 2.867224216 |
| 10.159103394 | 8.208617210  | 4.529948711 |
| 12.186620712 | 7.037289619  | 2.858686209 |
| 14.206096649 | 8.228154182  | 4.523274899 |
| 16.249460220 | 7.042299747  | 2.869286299 |
| 18.284408569 | 8.212740898  | 4.532138824 |
| 18.279865265 | 10.560288429 | 2.865492344 |
| -4.065326691 | 11.730192184 | 4.532093525 |
| -2.029017448 | 10.562291145 | 2.865376234 |
| 0.002136230  | 11.728524208 | 4.538251400 |
| 2.034881592  | 10.565413475 | 2.865321159 |
| 4.064814091  | 11.737238884 | 4.538479328 |
| 6.117373943  | 10.592741013 | 2.881669521 |
| 8.160574913  | 11.767748833 | 4.550422668 |
| 10.159364700 | 10.558694839 | 2.871086121 |
| 12.153676987 | 11.766158104 | 4.554100513 |
| 14.191881180 | 10.596021652 | 2.875861645 |



|              |              |             |
|--------------|--------------|-------------|
| 16.247119904 | 11.733845711 | 4.535081387 |
| 16.204767227 | 14.082427979 | 2.875533342 |
| -6.117855072 | 15.253976822 | 4.522775650 |
| -4.068883896 | 14.077583313 | 2.869002819 |
| -2.031399250 | 15.250668526 | 4.537217617 |
| 0.010978699  | 14.075493813 | 2.876261234 |
| 2.063021660  | 15.247766495 | 4.527268887 |
| 4.113791466  | 14.078597069 | 2.869483232 |
| 6.142101288  | 15.263834000 | 4.547828674 |
| 8.238200188  | 14.142410278 | 2.902543306 |
| 12.080828667 | 14.139278412 | 2.904782057 |
| 14.172563553 | 15.262846947 | 4.553838253 |
| 14.221033096 | 17.593765259 | 2.870977163 |
| -8.124396324 | 18.768945694 | 4.529928207 |
| -6.096266270 | 17.598659515 | 2.858650208 |
| -4.063831329 | 18.765359879 | 4.528144836 |
| -2.030020714 | 17.591529846 | 2.865619421 |
| 0.000919342  | 18.764997482 | 4.532218456 |
| 2.031954765  | 17.592920303 | 2.863568783 |
| 4.060238838  | 18.770082474 | 4.529686451 |
| 6.092115402  | 17.596946716 | 2.866493702 |
| 8.137660027  | 18.720237732 | 4.547812462 |
| 10.156864166 | 17.465641022 | 2.902531862 |
| 12.174582481 | 18.720174789 | 4.550398827 |
| 10.159547806 | 15.248610497 | 4.277130604 |

As@Sb

1.0

|                |               |               |
|----------------|---------------|---------------|
| 24.3805007935  | 0.0000000000  | 0.0000000000  |
| -12.1902634379 | 21.1142400404 | 0.0000000000  |
| 0.0000000000   | 0.0000000000  | 20.0000000000 |

Sb As

71 1

Cartesian

|              |              |             |
|--------------|--------------|-------------|
| 12.178075790 | 21.089645386 | 2.879803181 |
| 2.027604580  | 1.160461068  | 4.536584854 |
| 4.065224171  | 0.003048151  | 2.867767334 |
| 6.094427109  | 1.171995640  | 4.539649963 |
| 8.123871803  | 0.002446816  | 2.868213415 |
| 10.158527374 | 1.173186779  | 4.533253193 |
| 0.000532150  | 21.113960266 | 2.867050171 |
| 14.223680496 | 1.173613906  | 4.532601833 |

|              |              |             |
|--------------|--------------|-------------|
| 16.255353928 | 0.000244378  | 2.865922451 |
| 18.293806076 | 1.157039523  | 4.533081532 |
| 8.139191628  | 21.089973450 | 2.870032787 |
| 22.344924927 | 1.171064973  | 4.537517548 |
| 22.344944000 | 3.516353369  | 2.867459059 |
| -0.001407862 | 4.690260887  | 4.531125546 |
| 2.032104254  | 3.512360573  | 2.871713161 |
| 4.063187599  | 4.692189217  | 4.539385319 |
| 6.095807552  | 3.518738508  | 2.874864578 |
| 8.127368927  | 4.693167210  | 4.539751530 |
| 10.154916763 | 3.520576477  | 2.868133068 |
| 12.192182541 | 4.694229126  | 4.527188778 |
| 14.226661682 | 3.519547701  | 2.866143227 |
| 16.252180099 | 4.691868305  | 4.539216042 |
| 18.288681030 | 3.513919115  | 2.876482964 |
| 20.318780899 | 4.691510677  | 4.539531708 |
| 20.315908432 | 7.033789635  | 2.867671967 |
| -2.032523155 | 8.211549759  | 4.530439377 |
| 0.000554562  | 7.037715912  | 2.865462542 |
| 2.032605648  | 8.214861870  | 4.529760838 |
| 4.069580078  | 7.041051865  | 2.871582270 |
| 6.103892326  | 8.220622063  | 4.537024021 |
| 8.125013351  | 7.034973621  | 2.867869854 |
| 10.159740448 | 8.209307671  | 4.528389454 |
| 12.187948227 | 7.037764072  | 2.857885361 |
| 14.210933685 | 8.222373962  | 4.524010181 |
| 16.251153946 | 7.038874149  | 2.868983507 |
| 18.284610748 | 8.211609840  | 4.532643795 |
| 18.282569885 | 10.558732033 | 2.865836382 |
| -4.064269066 | 11.730543137 | 4.532637119 |
| -2.028689861 | 10.560235977 | 2.867650747 |
| 0.001247406  | 11.728996277 | 4.539298534 |
| 2.031465054  | 10.563096046 | 2.865787029 |
| 4.062441826  | 11.734656334 | 4.536584377 |
| 6.110063553  | 10.579418182 | 2.879877567 |
| 8.151282310  | 11.755968094 | 4.543201447 |
| 10.159261703 | 10.557983398 | 2.867126226 |
| 12.165517807 | 11.756599426 | 4.543073654 |
| 14.202235222 | 10.583632469 | 2.871524096 |
| 16.249313354 | 11.732669830 | 4.533190727 |
| 16.220886230 | 14.080017090 | 2.871517897 |
| -6.110422134 | 15.252929688 | 4.524261475 |

|              |              |             |
|--------------|--------------|-------------|
| -4.065424442 | 14.077977180 | 2.869030476 |
| -2.032433033 | 15.250652313 | 4.539317608 |
| 0.005785942  | 14.076014519 | 2.876396656 |
| 2.049077988  | 15.249640465 | 4.533315182 |
| 4.090218544  | 14.078233719 | 2.869997025 |
| 6.127699852  | 15.256807327 | 4.536308765 |
| 8.197108269  | 14.114916801 | 2.884018660 |
| 12.123432159 | 14.114717484 | 2.883025169 |
| 14.186714172 | 15.257307053 | 4.543045998 |
| 14.221660614 | 17.593978882 | 2.866994143 |
| -8.124767303 | 18.768064499 | 4.528403282 |
| -6.095773220 | 17.597402573 | 2.858380318 |
| -4.064232826 | 18.765773773 | 4.527678490 |
| -2.030000687 | 17.591043472 | 2.866376400 |
| 0.000385284  | 18.766496658 | 4.532635689 |
| 2.031825066  | 17.593111038 | 2.865800619 |
| 4.063134193  | 18.767761230 | 4.530453682 |
| 6.093849182  | 17.595928192 | 2.863241434 |
| 8.136529922  | 18.736124039 | 4.536371231 |
| 10.159982681 | 17.514808655 | 2.884025574 |
| 12.180156708 | 18.733688354 | 4.543226242 |
| 10.161449432 | 15.247448921 | 4.366198540 |

O@Sb

1.0

|                |               |               |
|----------------|---------------|---------------|
| 24.3805007935  | 0.0000000000  | 0.0000000000  |
| -12.1902634379 | 21.1142400404 | 0.0000000000  |
| 0.0000000000   | 0.0000000000  | 20.0000000000 |

Sb O

71 1

Cartesian

|              |              |              |
|--------------|--------------|--------------|
| 12.141901970 | 21.030370712 | 10.428528786 |
| 2.015685320  | 1.130369425  | 12.060613632 |
| -8.128538132 | 21.102621078 | 10.397495270 |
| 6.088426113  | 1.179756522  | 12.056912422 |
| -4.064930916 | 21.112964630 | 10.401286125 |
| 10.157022476 | 1.174226284  | 12.068128586 |
| 0.001991272  | 21.113325119 | 10.405151367 |
| 14.230491638 | 1.174704909  | 12.063361168 |
| 4.069277763  | 21.097499847 | 10.404314995 |
| 18.309223175 | 1.127990484  | 12.060285568 |
| 8.179155350  | 21.022192001 | 10.428411484 |

|              |              |              |
|--------------|--------------|--------------|
| 22.348526001 | 1.156671524  | 12.096475601 |
| 22.344703674 | 3.494706631  | 10.408422470 |
| -0.002274752 | 4.689370632  | 12.060805321 |
| 2.017900944  | 3.493469954  | 10.401029587 |
| 4.067014694  | 4.690394402  | 12.047228813 |
| 6.096209526  | 3.518715858  | 10.379722595 |
| 8.117927551  | 4.694992542  | 12.056749344 |
| 10.159106255 | 3.521226883  | 10.400980949 |
| 12.197100639 | 4.699102879  | 12.058821678 |
| 14.221213341 | 3.515967846  | 10.389369965 |
| 16.253604889 | 4.686333179  | 12.051897049 |
| 18.300859451 | 3.491852999  | 10.400852203 |
| 20.315156937 | 4.683626175  | 12.069734573 |
| 20.306934357 | 7.036754131  | 10.406042099 |
| -2.031888723 | 8.210935593  | 12.061410904 |
| -0.000746250 | 7.038106441  | 10.391722679 |
| 2.032159328  | 8.215841293  | 12.060080528 |
| 4.077547550  | 7.063408375  | 10.400520325 |
| 6.123487949  | 8.246853828  | 12.060055733 |
| 8.135451317  | 7.045680046  | 10.396974564 |
| 10.160028458 | 8.202940941  | 12.082128525 |
| 12.181544304 | 7.045964241  | 10.393280029 |
| 14.190153122 | 8.246032715  | 12.061699867 |
| 16.240859985 | 7.062275887  | 10.408523560 |
| 18.277919769 | 8.214134216  | 12.078306198 |
| 18.255968094 | 10.574226379 | 10.427584648 |
| -4.069107056 | 11.734963417 | 12.077263832 |
| -2.036719799 | 10.564851761 | 10.403970718 |
| 0.005631924  | 11.737264633 | 12.064925194 |
| 2.051069260  | 10.572939873 | 10.406316757 |
| 4.076966763  | 11.738746643 | 12.095090866 |
| 6.143878937  | 10.641432762 | 10.427881241 |
| 8.194424629  | 11.824085236 | 12.100723267 |
| 10.160326004 | 10.552947044 | 10.428359985 |
| 12.115631104 | 11.831008911 | 12.105461121 |
| 14.170333862 | 10.646333694 | 10.436739922 |
| 16.229438782 | 11.743971825 | 12.113675117 |
| 16.149593353 | 14.076217651 | 10.437042236 |
| -6.142117500 | 15.259448051 | 12.061733246 |
| -4.092168808 | 14.075134277 | 10.407868385 |
| -2.026873589 | 15.251507759 | 12.050159454 |
| 0.030092239  | 14.077906609 | 10.395779610 |

|               |              |              |
|---------------|--------------|--------------|
| 2.081303596   | 15.250761986 | 12.056841850 |
| 4.169325829   | 14.076736450 | 10.426348686 |
| 6.217265129   | 15.259090424 | 12.103130341 |
| 8.295304298   | 14.169314384 | 10.405573845 |
| 12.022189140  | 14.173552513 | 10.404655457 |
| 14.097463608  | 15.263707161 | 12.106285095 |
| -10.153851509 | 17.595849991 | 10.428544998 |
| -8.118837357  | 18.770933151 | 12.082444191 |
| -6.106508255  | 17.598798752 | 10.393217087 |
| -4.066329479  | 18.758907318 | 12.058914185 |
| -2.029924393  | 17.597839355 | 10.389215469 |
| 0.002601624   | 18.760086060 | 12.062973022 |
| 2.048542023   | 17.599700928 | 10.402894974 |
| 4.063713074   | 18.767356873 | 12.092500687 |
| 6.093524933   | 17.596101761 | 10.430611610 |
| 8.179953575   | 18.655954361 | 12.103285789 |
| 10.163069725  | 17.401668549 | 10.405062675 |
| 12.142532349  | 18.662687302 | 12.100780487 |
| 10.160856247  | 15.248155594 | 11.023818016 |

S@Sb

1.0

|                |               |               |
|----------------|---------------|---------------|
| 24.3805007935  | 0.0000000000  | 0.0000000000  |
| -12.1902634379 | 21.1142400404 | 0.0000000000  |
| 0.0000000000   | 0.0000000000  | 20.0000000000 |

Sb S

71 1

Cartesian

|              |              |             |
|--------------|--------------|-------------|
| 12.168539047 | 21.083318710 | 2.896520138 |
| 2.034600258  | 1.169821262  | 4.540355206 |
| -8.126058578 | 21.108333588 | 2.875914812 |
| 6.094548225  | 1.178342700  | 4.535243034 |
| 8.126085281  | 0.001204279  | 2.869445324 |
| 10.159910202 | 1.172209501  | 4.535183430 |
| 12.189597130 | 0.000369982  | 2.864699602 |
| 14.225296974 | 1.177893996  | 4.527254581 |
| 4.070161819  | 21.107109070 | 2.872061729 |
| 18.287456512 | 1.167846441  | 4.538315296 |
| 8.152785301  | 21.081027985 | 2.893165588 |
| 22.348751068 | 1.173077703  | 4.563684940 |
| 22.348428726 | 3.503043413  | 2.869256735 |
| 0.002381325  | 4.690442562  | 4.524661064 |

|              |              |             |
|--------------|--------------|-------------|
| 2.027762413  | 3.504742861  | 2.860688686 |
| 4.065261841  | 4.690987110  | 4.518710136 |
| 6.098227501  | 3.517264366  | 2.857961178 |
| 8.122078896  | 4.690252781  | 4.534831524 |
| 10.157130241 | 3.518991232  | 2.869410753 |
| 12.196310997 | 4.694766998  | 4.528382778 |
| 14.222357750 | 3.520860910  | 2.855379343 |
| 16.253170013 | 4.693216324  | 4.518845081 |
| 18.291662216 | 3.506048679  | 2.861144304 |
| 20.315946579 | 4.688828945  | 4.528147221 |
| 20.315786362 | 7.038288593  | 2.865239620 |
| -2.028057814 | 8.208972931  | 4.528234005 |
| 0.000979424  | 7.037518501  | 2.857023478 |
| 2.034299850  | 8.209799767  | 4.524645805 |
| 4.073909283  | 7.048663616  | 2.860785723 |
| 6.099310875  | 8.210350990  | 4.540479660 |
| 8.132217407  | 7.040811539  | 2.875705957 |
| 10.162505150 | 8.196356773  | 4.555944920 |
| 12.185184479 | 7.043574333  | 2.866130352 |
| 14.212886810 | 8.217271805  | 4.533554077 |
| 16.245225906 | 7.052550316  | 2.861938715 |
| 18.280757904 | 8.211508751  | 4.531779766 |
| 18.271501541 | 10.565093040 | 2.873870373 |
| -4.066206932 | 11.733952522 | 4.531813145 |
| -2.032787800 | 10.558215141 | 2.865272045 |
| 0.002161503  | 11.732766151 | 4.528099537 |
| 2.045329571  | 10.565415382 | 2.869271278 |
| 4.063282967  | 11.730184555 | 4.563703537 |
| 6.110856533  | 10.591377258 | 2.896518707 |
| 8.147684097  | 11.764337540 | 4.577521801 |
| 10.157373428 | 10.551779747 | 2.908160448 |
| 12.166292191 | 11.771592140 | 4.572065353 |
| 14.200641632 | 10.596484184 | 2.888338566 |
| 16.247592926 | 11.733590126 | 4.557900429 |
| 16.208927155 | 14.074869156 | 2.888341427 |
| -6.105083942 | 15.253915787 | 4.533728600 |
| -4.080179691 | 14.076276779 | 2.862000465 |
| -2.032972813 | 15.249077797 | 4.518796921 |
| 0.014415741  | 14.077315331 | 2.861201525 |
| 2.037391663  | 15.249964714 | 4.538488865 |
| 4.105162621  | 14.070299149 | 2.893153429 |
| 6.137625694  | 15.248352051 | 4.575466633 |

|               |              |             |
|---------------|--------------|-------------|
| 8.098707199   | 14.055955887 | 2.857252598 |
| 12.206390381  | 14.066775322 | 2.853550434 |
| 14.173559189  | 15.248736382 | 4.572136879 |
| -10.154594421 | 17.598665237 | 2.908318520 |
| -8.112154007  | 18.772226334 | 4.555973053 |
| -6.102480412  | 17.596797943 | 2.866385937 |
| -4.062719822  | 18.761556625 | 4.528505802 |
| -2.033082962  | 17.593996048 | 2.855399847 |
| -0.002452850  | 18.762834549 | 4.527234554 |
| 2.041296005   | 17.592838287 | 2.872054338 |
| 4.055928230   | 18.772520065 | 4.554577827 |
| 6.094764709   | 17.595405579 | 2.905824423 |
| 8.148811340   | 18.731786728 | 4.575389862 |
| 10.162116051  | 17.629713058 | 2.857295036 |
| 12.171100616  | 18.733106613 | 4.577692986 |
| 10.156970978  | 15.250074387 | 3.987972736 |

Se@Sb

1.0

|                |               |               |
|----------------|---------------|---------------|
| 24.3805007935  | 0.0000000000  | 0.0000000000  |
| -12.1902634379 | 21.1142400404 | 0.0000000000  |
| 0.0000000000   | 0.0000000000  | 20.0000000000 |

Sb Se

71 1

Cartesian

|              |              |              |
|--------------|--------------|--------------|
| 12.173541069 | 21.096895218 | 10.426087379 |
| 2.036634445  | 1.178103447  | 12.068375587 |
| -8.131179810 | 21.109178543 | 10.400575638 |
| 6.092432022  | 1.179788113  | 12.054786682 |
| 8.127518654  | 0.002407339  | 10.394402504 |
| 10.156813622 | 1.173678279  | 12.064596176 |
| 12.183996201 | 0.003875269  | 10.392388344 |
| 14.225993156 | 1.176243544  | 12.047740936 |
| 4.068594933  | 21.111501694 | 10.388241768 |
| 18.276676178 | 1.178843141  | 12.061491013 |
| 8.141691208  | 21.098901749 | 10.420166016 |
| 22.346071243 | 1.173014879  | 12.093744278 |
| 22.348964691 | 3.502864361  | 10.402058601 |
| 0.003472328  | 4.691523552  | 12.052931786 |
| 2.027950287  | 3.509122610  | 10.386817932 |
| 4.064786434  | 4.690942764  | 12.043980598 |
| 6.095955849  | 3.518922567  | 10.380171776 |

|              |              |              |
|--------------|--------------|--------------|
| 8.119799614  | 4.691082001  | 12.055084229 |
| 10.156949043 | 3.517028809  | 10.395002365 |
| 12.194658279 | 4.691813946  | 12.053928375 |
| 14.220548630 | 3.520723104  | 10.380419731 |
| 16.253314972 | 4.691705227  | 12.042354584 |
| 18.289920807 | 3.511436701  | 10.382918358 |
| 20.313375473 | 4.688019753  | 12.054859161 |
| 20.317646027 | 7.035987377  | 10.391443253 |
| -2.028965712 | 8.209236145  | 12.054088593 |
| 0.001171589  | 7.037571907  | 10.386394501 |
| 2.033746719  | 8.208607674  | 12.053371429 |
| 4.070251942  | 7.046263695  | 10.387645721 |
| 6.093465328  | 8.204184532  | 12.068885803 |
| 8.128974915  | 7.044229031  | 10.400596619 |
| 10.160718918 | 8.197890282  | 12.078104019 |
| 12.187609673 | 7.042799950  | 10.396300316 |
| 14.221557617 | 8.203118324  | 12.064445496 |
| 16.248931885 | 7.047564030  | 10.386867523 |
| 18.283420563 | 8.207962990  | 12.057141304 |
| 18.275634766 | 10.563013077 | 10.403948784 |
| -4.062044144 | 11.734042168 | 12.057813644 |
| -2.029941559 | 10.557916641 | 10.392538071 |
| 0.001340866  | 11.735394478 | 12.055916786 |
| 2.045480251  | 10.565357208 | 10.402801514 |
| 4.061313629  | 11.731972694 | 12.095441818 |
| 6.100873947  | 10.580270767 | 10.427114487 |
| 8.138670921  | 11.752044678 | 12.104139328 |
| 10.158565521 | 10.556395531 | 10.434736252 |
| 12.179565430 | 11.752851486 | 12.100332260 |
| 14.213892937 | 10.579122543 | 10.421223640 |
| 16.253854752 | 11.729837418 | 12.089921951 |
| 16.230545044 | 14.071998596 | 10.421358109 |
| -6.088263035 | 15.253455162 | 12.064325333 |
| -4.074074268 | 14.075482368 | 10.386618614 |
| -2.031726360 | 15.249577522 | 12.042392731 |
| 0.009352684  | 14.075927734 | 10.383703232 |
| 2.022294044  | 15.254472733 | 12.062595367 |
| 4.084142685  | 14.070654869 | 10.421943665 |
| 6.120624542  | 15.248492241 | 12.094638824 |
| 8.044757843  | 14.023348808 | 10.367206573 |
| 12.271730423 | 14.029324532 | 10.368803978 |
| 14.197098732 | 15.247030258 | 12.100715637 |



|               |              |              |
|---------------|--------------|--------------|
| -10.157670975 | 17.595447540 | 10.435106277 |
| -8.114097595  | 18.773067474 | 12.078451157 |
| -6.100827217  | 17.594947815 | 10.396155357 |
| -4.060895920  | 18.764423370 | 12.053313255 |
| -2.033475876  | 17.595407486 | 10.380249977 |
| -0.000665665  | 18.763433456 | 12.047485352 |
| 2.036639214   | 17.592050552 | 10.388210297 |
| 4.054018974   | 18.773624420 | 12.063901901 |
| 6.097818375   | 17.593484879 | 10.423227310 |
| 8.140059471   | 18.746934891 | 12.094207764 |
| 10.163058281  | 17.692630768 | 10.367194176 |
| 12.177021027  | 18.747053146 | 12.103927612 |
| 10.156877518  | 15.249995232 | 11.615158081 |

Te@Sb

1.0

|                |               |               |
|----------------|---------------|---------------|
| 24.3805007935  | 0.0000000000  | 0.0000000000  |
| -12.1902634379 | 21.1142400404 | 0.0000000000  |
| 0.0000000000   | 0.0000000000  | 20.0000000000 |

Sb Te

71 1

Cartesian

|              |             |              |
|--------------|-------------|--------------|
| 24.371110916 | 0.006352157 | 10.416307449 |
| 2.050770998  | 1.194261909 | 12.060947418 |
| 4.061182976  | 0.005637771 | 10.384071350 |
| 6.090107918  | 1.180679440 | 12.048612595 |
| 8.137091637  | 0.004250258 | 10.398083687 |
| 10.158342361 | 1.173087358 | 12.077498436 |
| 12.181159973 | 0.005158358 | 10.400772095 |
| 14.228136063 | 1.178837061 | 12.052392006 |
| 16.255365372 | 0.003553557 | 10.384873390 |
| 18.268510818 | 1.191160440 | 12.057928085 |
| 20.333387375 | 0.001222341 | 10.415084839 |
| 22.350782394 | 1.180621743 | 12.088920593 |
| 22.351327896 | 3.508753061 | 10.397525787 |
| 0.007821083  | 4.689757824 | 12.049926758 |
| 2.027270317  | 3.513780594 | 10.372179985 |
| 4.064012527  | 4.691633701 | 12.032684326 |
| 6.096639633  | 3.518156052 | 10.371836662 |
| 8.117777824  | 4.692478180 | 12.048555374 |
| 10.160086632 | 3.508111954 | 10.398097038 |
| 12.196683884 | 4.687524796 | 12.053010941 |

|              |              |              |
|--------------|--------------|--------------|
| 14.218439102 | 3.515718460  | 10.375715256 |
| 16.254730225 | 4.686787605  | 12.037311554 |
| 18.288829803 | 3.517137289  | 10.373035431 |
| 20.310676575 | 4.691514015  | 12.048927307 |
| -4.063247204 | 7.037849903  | 10.386046410 |
| -2.031454563 | 8.211008072  | 12.050814629 |
| 0.000771999  | 7.037704945  | 10.387338638 |
| 2.037751198  | 8.205580711  | 12.049827576 |
| 4.065855026  | 7.044639587  | 10.372068405 |
| 6.086362362  | 8.184420586  | 12.060729027 |
| 8.121031761  | 7.037159920  | 10.384128571 |
| 10.154698372 | 8.195521355  | 12.056564331 |
| 12.191543579 | 7.035215378  | 10.390524864 |
| 14.224832535 | 8.193408966  | 12.062900543 |
| 16.252614975 | 7.045543194  | 10.381992340 |
| 18.284786224 | 8.200459480  | 12.057935715 |
| 18.279747009 | 10.560183525 | 10.408644676 |
| -4.054585457 | 11.735924721 | 12.057867050 |
| -2.031421185 | 10.557178497 | 10.386046410 |
| -0.002868176 | 11.736031532 | 12.048958778 |
| 2.041852474  | 10.560162544 | 10.397371292 |
| 4.057784557  | 11.724452972 | 12.088821411 |
| 6.084472179  | 10.561577797 | 10.416000366 |
| 8.124292374  | 11.718262672 | 12.097934723 |
| 10.155929565 | 10.560014725 | 10.418579102 |
| 12.190330505 | 11.717920303 | 12.092739105 |
| 14.239801407 | 10.558079720 | 10.417228699 |
| 16.261449814 | 11.725407600 | 12.095268250 |
| 16.261447906 | 14.060103416 | 10.417428017 |
| -6.078541756 | 15.255686760 | 12.062864304 |
| -4.070619106 | 14.073214531 | 10.381880760 |
| -2.026908398 | 15.250864029 | 12.037033081 |
| 0.003360748  | 14.074039459 | 10.372953415 |
| 2.007675171  | 15.254751205 | 12.057903290 |
| 4.069865227  | 14.061547279 | 10.415267944 |
| 6.080586433  | 15.250751495 | 12.098546028 |
| 7.996253014  | 13.998067856 | 10.377701759 |
| 12.277582169 | 14.025604248 | 10.395442963 |
| 14.232640266 | 15.255197525 | 12.092767715 |
| 14.218106270 | 17.596078873 | 10.418766975 |
| -8.115236282 | 18.779575348 | 12.056599617 |
| -6.092087746 | 17.595720291 | 10.390497208 |

|              |              |              |
|--------------|--------------|--------------|
| -4.056262970 | 18.764995575 | 12.052959442 |
| -2.030741692 | 17.600000381 | 10.375536919 |
| -0.002220154 | 18.759937286 | 12.052284241 |
| 2.029492378  | 17.592048645 | 10.384875298 |
| 4.047229767  | 18.777627945 | 12.057163239 |
| 6.098340034  | 17.593564987 | 10.425720215 |
| 8.118440628  | 18.780025482 | 12.098672867 |
| 10.160814285 | 17.749000549 | 10.376857758 |
| 12.199115753 | 18.776296616 | 12.098096848 |
| 10.168720245 | 15.241961479 | 11.906781197 |

(2) D@Sb-H structure atomic coordinates (Cartesian)

O@Sb -H

1.0

|                |               |               |
|----------------|---------------|---------------|
| 24.3805007935  | 0.0000000000  | 0.0000000000  |
| -12.1902634379 | 21.1142400404 | 0.0000000000  |
| 0.0000000000   | 0.0000000000  | 20.0000000000 |

Sb O H

71 1 1

Cartesian

|               |              |              |
|---------------|--------------|--------------|
| -12.170452118 | 21.101715088 | 10.391065598 |
| 2.060572624   | 1.167558193  | 12.044061661 |
| 4.122911453   | 0.026842222  | 10.395805359 |
| 6.140524864   | 1.208895326  | 12.070158958 |
| 8.172979355   | 0.022211516  | 10.414344788 |
| 10.203969955  | 1.195631027  | 12.079727173 |
| 12.225549698  | 0.010758514  | 10.407833099 |
| 14.269715309  | 1.178748131  | 12.063276291 |
| 4.089622498   | 21.100635529 | 10.379106522 |
| 18.345335007  | 1.087547302  | 12.046414375 |
| 8.238696098   | 20.977365494 | 10.435247421 |
| 22.394041061  | 1.149444342  | 12.089908600 |
| 22.345554352  | 3.491775513  | 10.410184860 |
| 0.008973122   | 4.678906441  | 12.054063797 |
| 2.040176392   | 3.515119553  | 10.380125999 |
| 4.068390846   | 4.691792965  | 12.047594070 |
| 6.126056671   | 3.543840408  | 10.392924309 |
| 8.151380539   | 4.732503414  | 12.054616928 |
| 10.184915543  | 3.538141251  | 10.406167984 |
| 12.216842651  | 4.726855278  | 12.061941147 |
| 14.237075806  | 3.527145386  | 10.396570206 |

|               |              |              |
|---------------|--------------|--------------|
| 16.262662888  | 4.695773125  | 12.064261436 |
| 18.317428589  | 3.486133337  | 10.419702530 |
| 20.329612732  | 4.675701141  | 12.090034485 |
| 20.293170929  | 7.027700901  | 10.426710129 |
| -2.042220831  | 8.208229065  | 12.071340561 |
| -0.024817467  | 7.028398037  | 10.391052246 |
| 2.021845341   | 8.207759857  | 12.034997940 |
| 4.046484470   | 7.024813652  | 10.367831230 |
| 6.077810764   | 8.209361076  | 12.023354530 |
| 8.126546860   | 7.058687210  | 10.362147331 |
| 10.151866913  | 8.257562637  | 12.019309998 |
| 12.190609932  | 7.064358711  | 10.377850533 |
| 14.169941902  | 8.304260254  | 12.052015305 |
| 16.236072540  | 7.084164619  | 10.426029205 |
| 18.274667740  | 8.223088264  | 12.099906921 |
| 18.252616882  | 10.569919586 | 10.431447983 |
| -4.073243618  | 11.747667313 | 12.069225311 |
| -2.061046124  | 10.548995018 | 10.396328926 |
| -0.008684158  | 11.726169586 | 12.034674644 |
| 2.000556469   | 10.540410042 | 10.348671913 |
| 4.056871891   | 11.728290558 | 11.973493576 |
| 6.070687294   | 10.523416519 | 10.310398102 |
| 8.099838257   | 11.759972572 | 11.905947685 |
| 10.186244011  | 10.585472107 | 10.327081680 |
| 12.055866241  | 11.905684471 | 12.081345558 |
| 14.156702042  | 10.723942757 | 10.445939064 |
| 16.246078491  | 11.777950287 | 12.113098145 |
| -8.133431435  | 14.099071503 | 10.416480064 |
| -6.089093208  | 15.278978348 | 12.066448212 |
| -4.071496010  | 14.088478088 | 10.395058632 |
| -2.027106762  | 15.253478050 | 12.051926613 |
| -0.016555786  | 14.072287560 | 10.370237350 |
| 2.025028229   | 15.232915878 | 12.030820847 |
| 4.025180817   | 14.078209877 | 10.314149857 |
| 6.113648415   | 15.211055756 | 11.909924507 |
| 8.094944000   | 14.055644989 | 10.160081863 |
| 12.071626663  | 14.362090111 | 10.473148346 |
| 14.253046989  | 15.304875374 | 12.107700348 |
| -10.070634842 | 17.645505905 | 10.432182312 |
| -8.044342041  | 18.818433762 | 12.088653564 |
| -6.042592049  | 17.626682281 | 10.406621933 |
| -4.007093430  | 18.785690308 | 12.074560165 |

|              |              |              |
|--------------|--------------|--------------|
| -1.993801117 | 17.607460022 | 10.395376205 |
| 0.048069954  | 18.767751694 | 12.058155060 |
| 2.056430817  | 17.584144592 | 10.371976852 |
| 4.108529091  | 18.741781235 | 12.025699615 |
| 6.138800621  | 17.605035782 | 10.331201553 |
| 8.218510628  | 18.572696686 | 12.078400612 |
| 10.343135834 | 17.356101990 | 10.464024544 |
| 12.251225471 | 18.778785706 | 12.092340469 |
| 10.736783981 | 15.590681076 | 11.433215141 |
| 6.828814507  | 13.325899124 | 9.189472198  |

S@Sb-H

1.0

|                |               |               |
|----------------|---------------|---------------|
| 24.3805007935  | 0.0000000000  | 0.0000000000  |
| -12.1902634379 | 21.1142400404 | 0.0000000000  |
| 0.0000000000   | 0.0000000000  | 20.0000000000 |

Sb S H

71 1 1

Cartesian

|              |              |             |
|--------------|--------------|-------------|
| 0.018059373  | 0.004512491  | 2.880338669 |
| 2.057859898  | 1.178793788  | 4.536847115 |
| 4.094641685  | 0.012472064  | 2.874367714 |
| 6.126207352  | 1.188498259  | 4.538942337 |
| 8.157300949  | 0.019551264  | 2.868721485 |
| 10.183223724 | 1.189325929  | 4.542795658 |
| 12.213385582 | 0.012828404  | 2.877479553 |
| 14.249894142 | 1.185103178  | 4.540992737 |
| 16.269720078 | 0.002581349  | 2.863596916 |
| 18.322450638 | 1.146348000  | 4.521070480 |
| 8.207130432  | 21.068502426 | 2.900133133 |
| 22.388353348 | 1.185206890  | 4.565415859 |
| -2.018821478 | 3.518232822  | 2.877965212 |
| 0.017214537  | 4.702581406  | 4.534170151 |
| 2.049766779  | 3.524755001  | 2.872164249 |
| 4.077088356  | 4.702968121  | 4.540534019 |
| 6.114885807  | 3.535843134  | 2.876063824 |
| 8.144302368  | 4.718683243  | 4.538148880 |
| 10.174997330 | 3.536695719  | 2.877532959 |
| 12.210746765 | 4.717139721  | 4.535948277 |
| 14.234951973 | 3.529248238  | 2.869124413 |
| 16.269002914 | 4.704643726  | 4.525270462 |
| 18.310947418 | 3.513793468  | 2.868708372 |

|               |              |             |
|---------------|--------------|-------------|
| 20.329738617  | 4.696202278  | 4.540434837 |
| -4.056694508  | 7.040675640  | 2.871342182 |
| -2.020160913  | 8.217803001  | 4.530418396 |
| 0.006921291   | 7.043005466  | 2.861330509 |
| 2.044805527   | 8.231010437  | 4.510723114 |
| 4.067381859   | 7.032688141  | 2.855772495 |
| 6.100320816   | 8.227812767  | 4.501069069 |
| 8.129792213   | 7.039857388  | 2.841615200 |
| 10.157306671  | 8.243950844  | 4.487850189 |
| 12.201114655  | 7.051104069  | 2.851514816 |
| 14.213706970  | 8.261935234  | 4.511393547 |
| 16.263956070  | 7.066937447  | 2.865980148 |
| 18.296344757  | 8.221280098  | 4.540283203 |
| -6.090402603  | 10.570522308 | 2.878377914 |
| -4.048787594  | 11.746410370 | 4.532276154 |
| -2.024102688  | 10.562773705 | 2.863121986 |
| 0.024546623   | 11.734093666 | 4.511047363 |
| 2.028149128   | 10.556640625 | 2.813883305 |
| 4.103248119   | 11.754737854 | 4.411251545 |
| 6.099133015   | 10.514626503 | 2.748739958 |
| 8.143011093   | 11.817237854 | 4.281501293 |
| 10.225282669  | 10.549217224 | 2.767355919 |
| 12.131249428  | 11.750956535 | 4.565381527 |
| 14.218997955  | 10.654094696 | 2.888258934 |
| 16.277812958  | 11.763249397 | 4.557739258 |
| -8.120386124  | 14.092551231 | 2.869735241 |
| -6.080054283  | 15.274272919 | 4.519900799 |
| -4.051561832  | 14.089097023 | 2.859878063 |
| -2.017067909  | 15.257553101 | 4.525444031 |
| 0.005170822   | 14.082984924 | 2.851643562 |
| 2.052149773   | 15.245984077 | 4.505151272 |
| 4.032693863   | 14.105892181 | 2.751151323 |
| 6.185521126   | 15.214365959 | 4.287506104 |
| 8.053518295   | 14.029860497 | 2.433932781 |
| 12.080801010  | 14.216692924 | 3.054095745 |
| 14.275231361  | 15.260298729 | 4.597407341 |
| -10.137803078 | 17.607572556 | 2.929398775 |
| -8.080533981  | 18.790166855 | 4.551724434 |
| -6.072241783  | 17.620800018 | 2.857341528 |
| -4.034375668  | 18.781076431 | 4.524315834 |
| -2.007171631  | 17.603412628 | 2.858855963 |
| 0.025386810   | 18.770479202 | 4.528836250 |

|              |              |             |
|--------------|--------------|-------------|
| 2.040586472  | 17.595497131 | 2.844989061 |
| 4.087567329  | 18.751056671 | 4.502128124 |
| 6.123149872  | 17.659973145 | 2.786934376 |
| 8.114365578  | 18.716209412 | 4.583883762 |
| 10.220757484 | 17.441320419 | 3.065399647 |
| 12.230595589 | 18.811553955 | 4.603060722 |
| 10.458462715 | 15.424191475 | 4.533649445 |
| 6.721631527  | 13.262382507 | 1.566838503 |

Se@Sb-H

1.0

|                |               |               |
|----------------|---------------|---------------|
| 24.3805007935  | 0.0000000000  | 0.0000000000  |
| -12.1902634379 | 21.1142400404 | 0.0000000000  |
| 0.0000000000   | 0.0000000000  | 20.0000000000 |

Sb Se H

71 1 1

Cartesian

|              |              |              |
|--------------|--------------|--------------|
| 0.011636637  | 0.002683389  | 10.397167206 |
| 2.054891586  | 1.181348443  | 12.041252136 |
| 4.090328217  | 0.008039585  | 10.384679794 |
| 6.113059044  | 1.184548736  | 12.058524132 |
| 8.154001236  | 0.013170644  | 10.403634071 |
| 10.177518845 | 1.185599685  | 12.078619957 |
| 12.210417747 | 0.007714567  | 10.418039322 |
| 14.251522064 | 1.178462982  | 12.074190140 |
| 16.267704010 | 0.003706404  | 10.389650345 |
| 18.316909790 | 1.159038663  | 12.043274879 |
| 8.196823120  | 21.086568832 | 10.419035912 |
| 22.386274338 | 1.191619635  | 12.081907272 |
| -2.019670963 | 3.528175354  | 10.401421547 |
| 0.018001318  | 4.704884052  | 12.057672501 |
| 2.047032595  | 3.533835888  | 10.387759209 |
| 4.075722694  | 4.702278137  | 12.060003281 |
| 6.107872963  | 3.529668331  | 10.394292831 |
| 8.137135506  | 4.712153435  | 12.054090500 |
| 10.176462173 | 3.527204037  | 10.408622742 |
| 12.205395699 | 4.711192131  | 12.070083618 |
| 14.232378960 | 3.524471045  | 10.408648491 |
| 16.270982742 | 4.706508636  | 12.054918289 |
| 18.305841446 | 3.522138119  | 10.390280724 |
| 20.326734543 | 4.702638626  | 12.061164856 |
| -4.054162502 | 7.050779343  | 10.399098396 |

|               |              |              |
|---------------|--------------|--------------|
| -2.020720959  | 8.220770836  | 12.065467834 |
| 0.008817196   | 7.052278042  | 10.395870209 |
| 2.048478127   | 8.237140656  | 12.044129372 |
| 4.066362381   | 7.038052082  | 10.384262085 |
| 6.107562542   | 8.237921715  | 12.014693260 |
| 8.125694275   | 7.032320023  | 10.355816841 |
| 10.152138710  | 8.234322548  | 12.000753403 |
| 12.200372696  | 7.037061691  | 10.375501633 |
| 14.212547302  | 8.245120049  | 12.037829399 |
| 16.261890411  | 7.061108112  | 10.391677856 |
| 18.293178558  | 8.222749710  | 12.063651085 |
| -6.087415695  | 10.569561958 | 10.399737358 |
| -4.048512459  | 11.746536255 | 12.054390907 |
| -2.016482353  | 10.564165115 | 10.397306442 |
| 0.032011986   | 11.736050606 | 12.044260025 |
| 2.030075073   | 10.557070732 | 10.340368271 |
| 4.118057251   | 11.757918358 | 11.914224625 |
| 6.105154514   | 10.512733459 | 10.246870041 |
| 8.150405884   | 11.830951691 | 11.766683578 |
| 10.237022400  | 10.539857864 | 10.282052994 |
| 12.145849228  | 11.710788727 | 12.097059250 |
| 14.228401184  | 10.631213188 | 10.413302422 |
| 16.280218124  | 11.758470535 | 12.077484131 |
| -8.119384766  | 14.090325356 | 10.393363953 |
| -6.077970505  | 15.269211769 | 12.041583061 |
| -4.042053699  | 14.090625763 | 10.387257576 |
| -2.014510632  | 15.253396034 | 12.065950394 |
| 0.009046555   | 14.086421013 | 10.389463425 |
| 2.066519737   | 15.245631218 | 12.029643059 |
| 4.035070419   | 14.111075401 | 10.259646416 |
| 6.211170197   | 15.212037086 | 11.772370338 |
| 8.053190231   | 14.025502205 | 9.900480270  |
| 12.094520569  | 14.173036575 | 10.603101730 |
| 14.278472900  | 15.252983093 | 12.129083633 |
| -10.156722069 | 17.597976685 | 10.457197189 |
| -8.089639664  | 18.787313461 | 12.064262390 |
| -6.070653439  | 17.616905212 | 10.382568359 |
| -4.043102264  | 18.778377533 | 12.062776566 |
| -2.007899284  | 17.602972031 | 10.406646729 |
| 0.029263496   | 18.767669678 | 12.070507050 |
| 2.033805847   | 17.596982956 | 10.373079300 |
| 4.087278366   | 18.748786926 | 12.021366119 |



|              |              |              |
|--------------|--------------|--------------|
| 6.124208450  | 17.672433853 | 10.297575951 |
| 8.092850685  | 18.746368408 | 12.108659744 |
| 10.199248314 | 17.471538544 | 10.612238884 |
| 12.227600098 | 18.821960449 | 12.137251854 |
| 10.388584137 | 15.383393288 | 12.214506149 |
| 6.714778900  | 13.259742737 | 9.038396835  |

Te@Sb-H

1.0

|                |               |               |
|----------------|---------------|---------------|
| 24.3805007935  | 0.0000000000  | 0.0000000000  |
| -12.1902634379 | 21.1142400404 | 0.0000000000  |
| 0.0000000000   | 0.0000000000  | 20.0000000000 |

Sb Te H

71 1 1

Cartesian

|              |              |              |
|--------------|--------------|--------------|
| 0.013995958  | 0.003519400  | 10.401310921 |
| 2.058803797  | 1.194169998  | 12.033076286 |
| -8.110201836 | 21.112495422 | 10.374989510 |
| 6.110661983  | 1.181285858  | 12.034453392 |
| 8.147955894  | 0.011926773  | 10.375332832 |
| 10.170617104 | 1.180353642  | 12.055569649 |
| 12.203524590 | 0.012766868  | 10.389726639 |
| 14.240483284 | 1.184593201  | 12.050800323 |
| 16.265829086 | 0.009747971  | 10.378394127 |
| 18.306858063 | 1.182352185  | 12.031671524 |
| 8.184913635  | 21.108848572 | 10.414056778 |
| 22.383764267 | 1.200476408  | 12.075482368 |
| -2.011099577 | 3.527280807  | 10.383302689 |
| 0.024897099  | 4.708988190  | 12.036581039 |
| 2.051288605  | 3.534904242  | 10.364203453 |
| 4.078389168  | 4.705528736  | 12.034442902 |
| 6.111002445  | 3.528474331  | 10.373571396 |
| 8.136799812  | 4.704889774  | 12.043175697 |
| 10.175871849 | 3.527099133  | 10.392923355 |
| 12.209117889 | 4.705999851  | 12.053640366 |
| 14.232434273 | 3.527830601  | 10.382342339 |
| 16.274198532 | 4.705359459  | 12.029747963 |
| 18.307338715 | 3.529406309  | 10.364980698 |
| 20.332054138 | 4.704614639  | 12.036719322 |
| -4.041482449 | 7.051908493  | 10.375072479 |
| -2.011443853 | 8.220759392  | 12.045318604 |
| 0.016951561  | 7.054417610  | 10.373496056 |

|              |              |              |
|--------------|--------------|--------------|
| 2.057111263  | 8.236045837  | 12.023122787 |
| 4.076612949  | 7.042154312  | 10.361003876 |
| 6.108002663  | 8.227980614  | 12.013704300 |
| 8.130044937  | 7.031032562  | 10.353202820 |
| 10.151811600 | 8.221871376  | 12.012682915 |
| 12.203722000 | 7.043833256  | 10.376343727 |
| 14.239475250 | 8.219913483  | 12.033939362 |
| 16.272415161 | 7.052776814  | 10.362766266 |
| 18.301504135 | 8.217082977  | 12.037383080 |
| -6.079199314 | 10.570734978 | 10.384850502 |
| -4.041523933 | 11.743830681 | 12.041074753 |
| -2.009951115 | 10.566448212 | 10.380395889 |
| 0.035706997  | 11.740983963 | 12.027959824 |
| 2.040461063  | 10.564159393 | 10.331407547 |
| 4.120933056  | 11.763878822 | 11.916769981 |
| 6.113053799  | 10.510993958 | 10.258720398 |
| 8.149822235  | 11.838470459 | 11.790090561 |
| 10.241025925 | 10.541465759 | 10.313371658 |
| 12.180967331 | 11.652302742 | 12.132644653 |
| 14.246154785 | 10.605934143 | 10.419358253 |
| 16.295690536 | 11.746865273 | 12.078044891 |
| -8.116826057 | 14.088849068 | 10.406646729 |
| -6.067961693 | 15.266283035 | 12.042766571 |
| -4.044383049 | 14.088316917 | 10.373712540 |
| -2.014063358 | 15.257549286 | 12.041061401 |
| 0.012785912  | 14.089924812 | 10.370471954 |
| 2.057587624  | 15.254763603 | 12.022050858 |
| 4.032417297  | 14.118119240 | 10.261661530 |
| 6.205484390  | 15.214584351 | 11.789826393 |
| 8.037258148  | 14.021584511 | 9.917209625  |
| 12.122073174 | 14.125885963 | 10.673178673 |
| 14.302907944 | 15.240864754 | 12.173533440 |
| 14.205017090 | 17.581951141 | 10.495426178 |
| -8.093525887 | 18.788721085 | 12.071849823 |
| -6.090404034 | 17.608890533 | 10.376690865 |
| -4.050643444 | 18.777347565 | 12.034920692 |
| -2.018813133 | 17.602125168 | 10.374020576 |
| 0.014338493  | 18.772371292 | 12.040426254 |
| 2.031278610  | 17.601968765 | 10.358282089 |
| 4.074357986  | 18.758617401 | 12.016463280 |
| 6.126976967  | 17.676549911 | 10.316084862 |
| 8.060699463  | 18.801000595 | 12.134092331 |

|              |              |              |
|--------------|--------------|--------------|
| 10.167638779 | 17.511034012 | 10.669919014 |
| 12.225401878 | 18.842971802 | 12.167549133 |
| 10.311801910 | 15.338357925 | 12.482593536 |
| 6.696562767  | 13.252120972 | 9.058544159  |
